# Supplementary material for: Thermally-promoted post-synthetic Pummerer chemistry in a sulfoxide-functionalized metal–organic framework
Source: Royal Society of Chemistry journal article supplement (doi:10.1039/c5ce00861a), 2015-01-01
Supplement: c5ce00861a1.pdf [file c5ce00861a1.pdf]

## Supplementary Information

### Thermally-Promoted Post-synthetic Pummerer Chemistry in a Sulfoxide-functionalized Metal-Organic Framework

Macguire R. Bryant,<sup>a</sup> and Christopher Richardson\*<sup>a</sup>

<sup>a</sup> School of Chemistry, University of Wollongong, Wollongong NSW 2522, Australia

#### Table of Contents

|                                                                                                                                                          |   |
|----------------------------------------------------------------------------------------------------------------------------------------------------------|---|
| 1. PXRD Data .....                                                                                                                                       | 2 |
| 2. Disproportionation reaction of H <sub>2</sub> L <sup>1</sup> to H <sub>2</sub> L <sup>2</sup> and H <sub>2</sub> L <sup>3</sup> during synthesis..... | 3 |
| 3. TG-DTA Data.....                                                                                                                                      | 4 |
| 4. NMR Spectra for H <sub>2</sub> L <sup>1</sup> .....                                                                                                   | 6 |
| 5. <sup>1</sup> H NMR Spectra for Digested Samples .....                                                                                                 | 7 |
| 6. Mass Spectrometry Data.....                                                                                                                           | 8 |
| 7. BET Surface Area Calculations .....                                                                                                                   | 9 |
| 8. References .....                                                                                                                                      | 9 |

## 1. PXRD Data

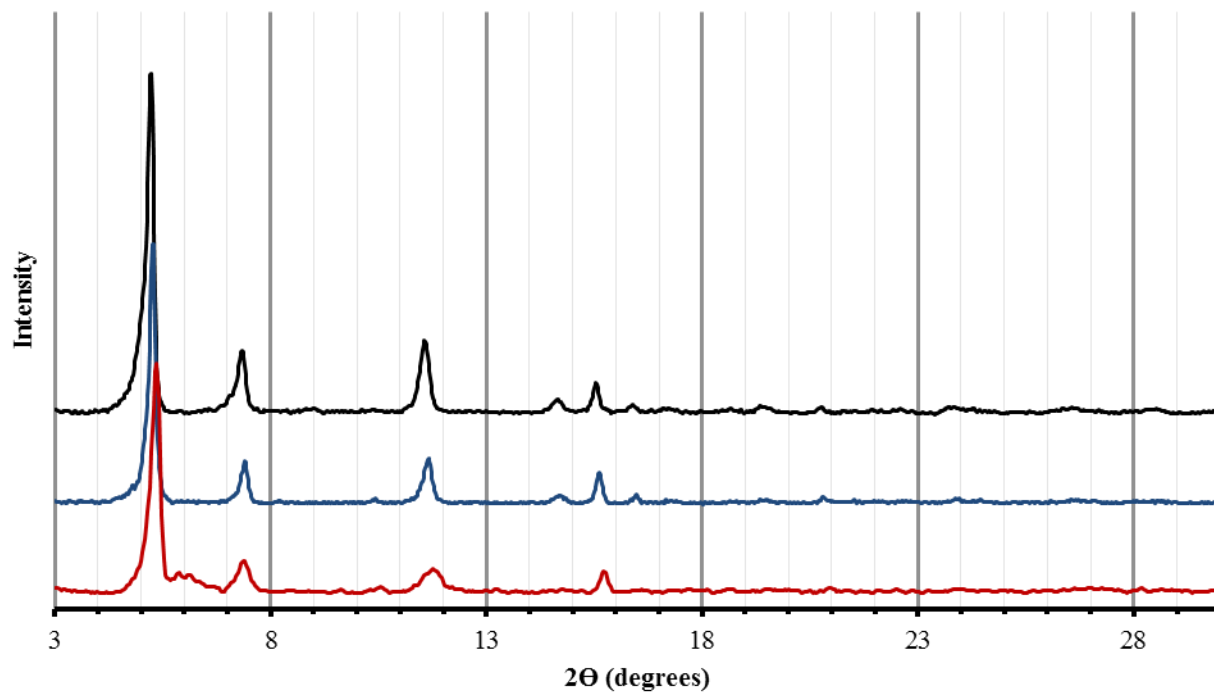

**Figure S 1:** An enlarged image of the PXRD patterns shown in the manuscript of 1 (red), 2 (blue) and of the sulfone sample<sup>1</sup> (black).

## 2. Disproportionation reaction of $H_2L^1$ to $H_2L^2$ and $H_2L^3$ during synthesis

The presence of sulfone can be explained by considering the diagram below (Fig S 2). During synthesis two sulfoxide ligands come together and undergo a disproportionation reaction.<sup>2-5</sup> The sulfide that is produced is then oxidized regenerating sulfoxide. Direct oxidation of sulfides to sulfoxides is easier to achieve than direct oxidation of sulfoxides to sulfones.<sup>3,5</sup>

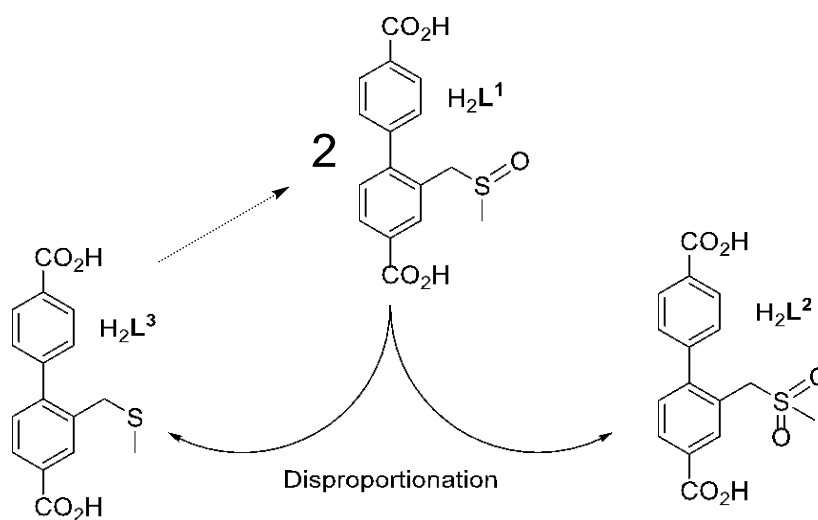

**Figure S 2:** Disproportionation chemistry by which  $H_2L^2$  can be formed during solvothermal synthesis and be incorporated into the crystals of MOF 1.

### 3. TG-DTA Data

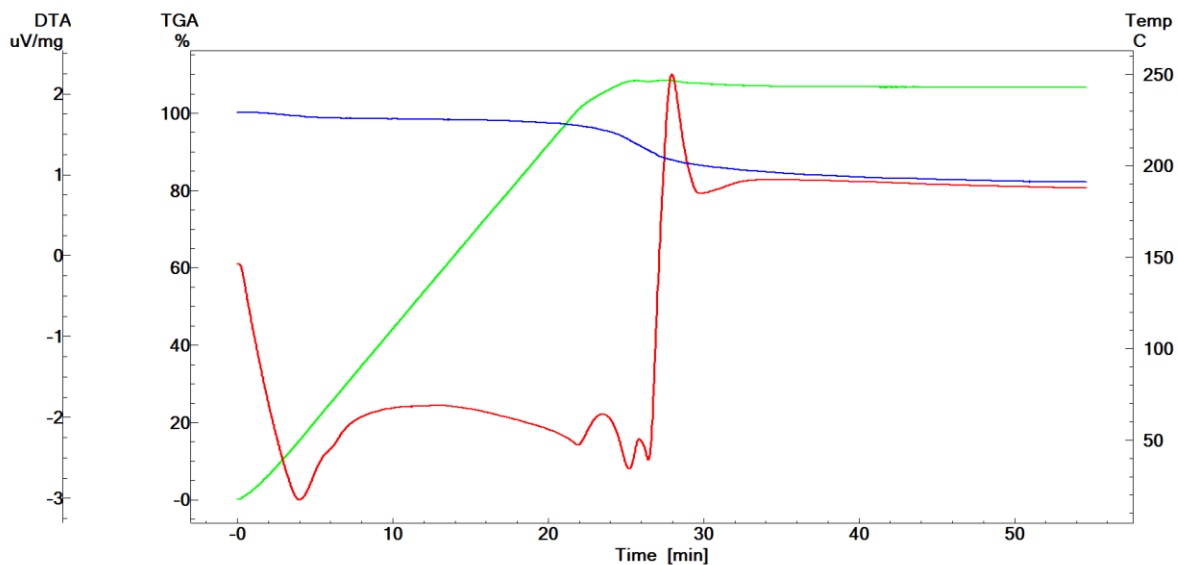

**Figure S 3:** TG-DTA of H<sub>2</sub>L<sup>1</sup>, holding at 245 °C for 30 minutes. Blue line is the TG curve; red line is DT curve; green line is temperature program.

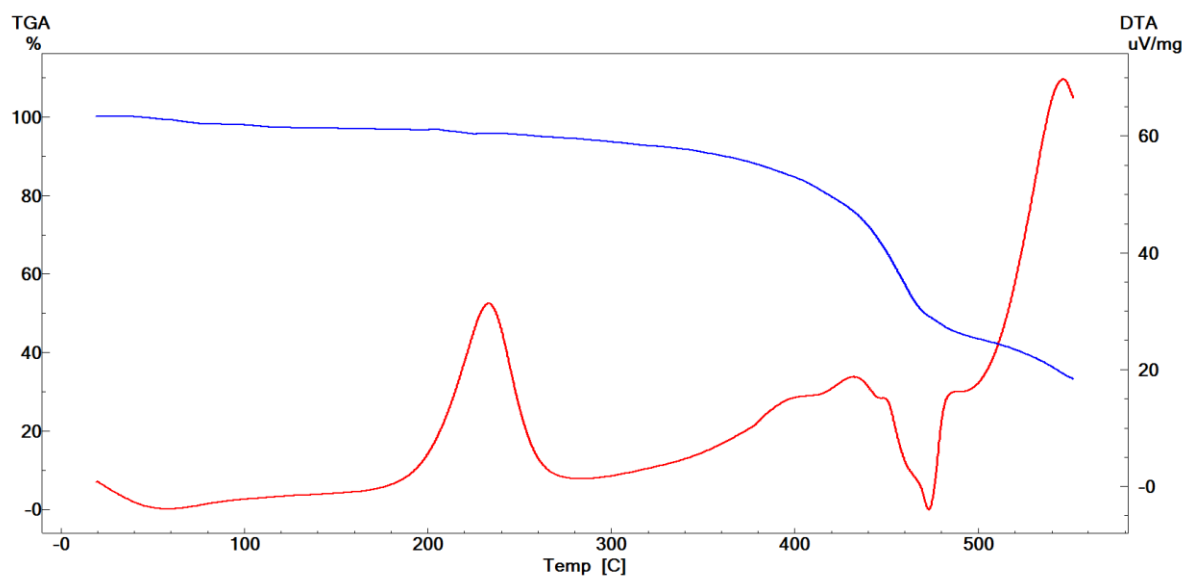

**Figure S 4:** An enlarged image of the TG-DTA of **1** shown in the manuscript, with weight loss calculations by TA-60 software. Blue line is the TG curve; red line is DT curve.

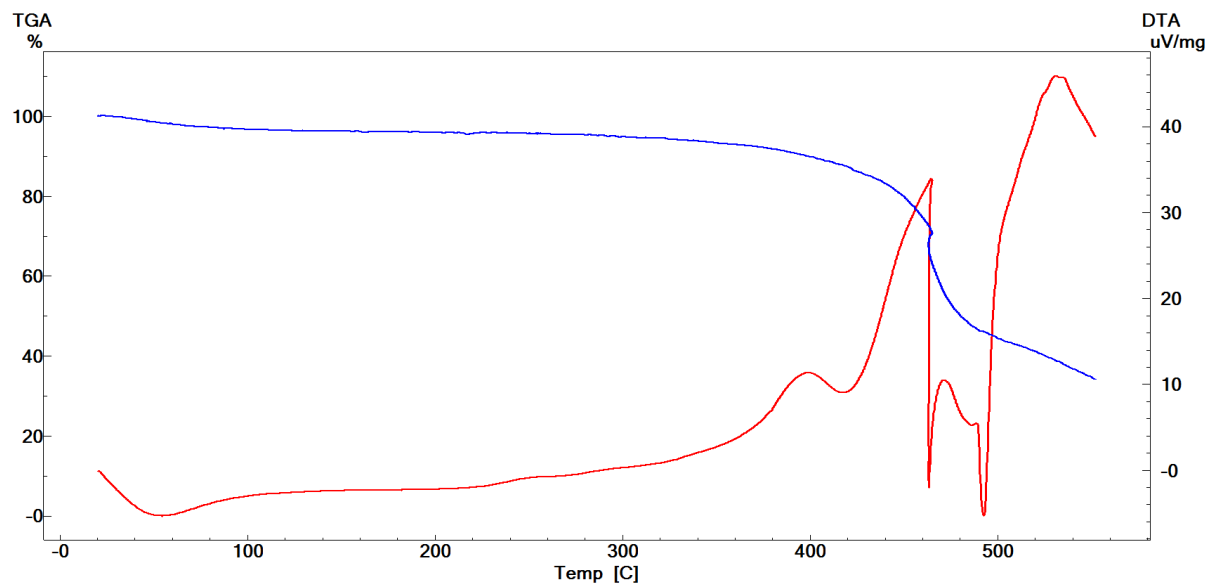

Figure S 5: TG-DTA of 2. Blue line is the TG curve; red line is DT curve.

#### 4. NMR Spectra for H<sub>2</sub>L<sup>1</sup>

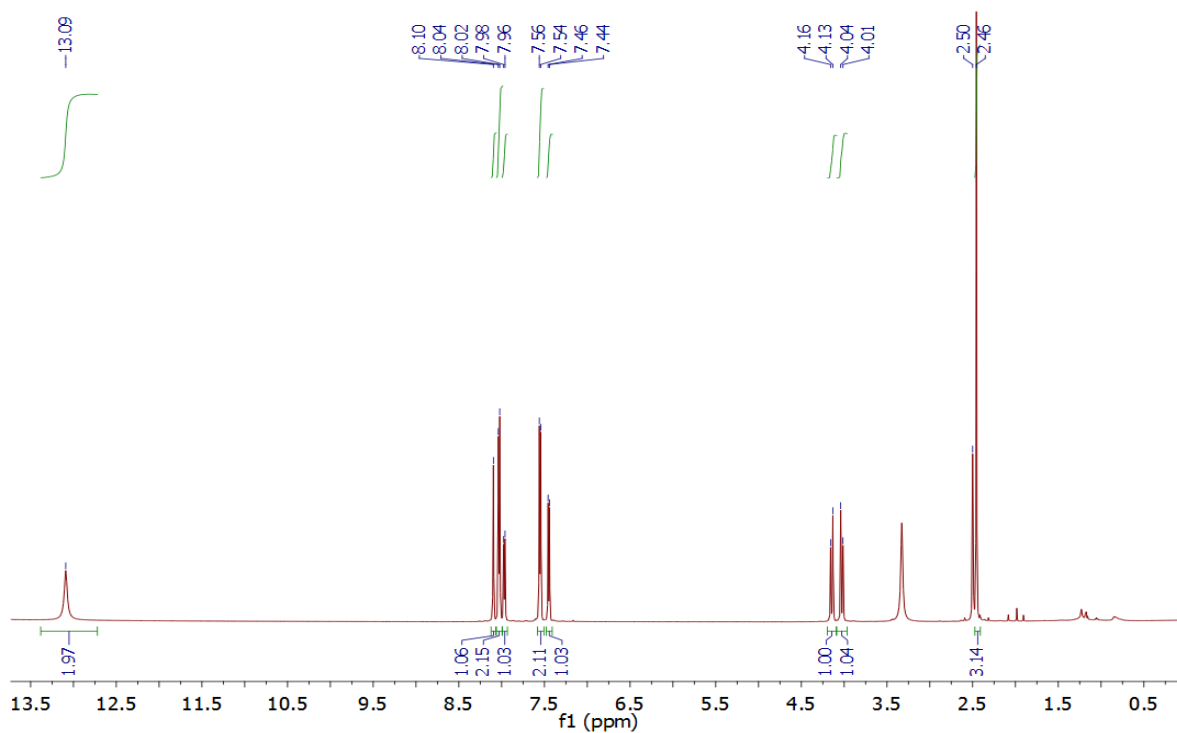

Figure S 6: <sup>1</sup>H NMR spectrum of 2-((methylsulfinyl)methyl)-[1, 1'-biphenyl]-4, 4'-dicarboxylic acid, H<sub>2</sub>L<sup>1</sup>; solvent: *d*<sub>6</sub>-DMSO.

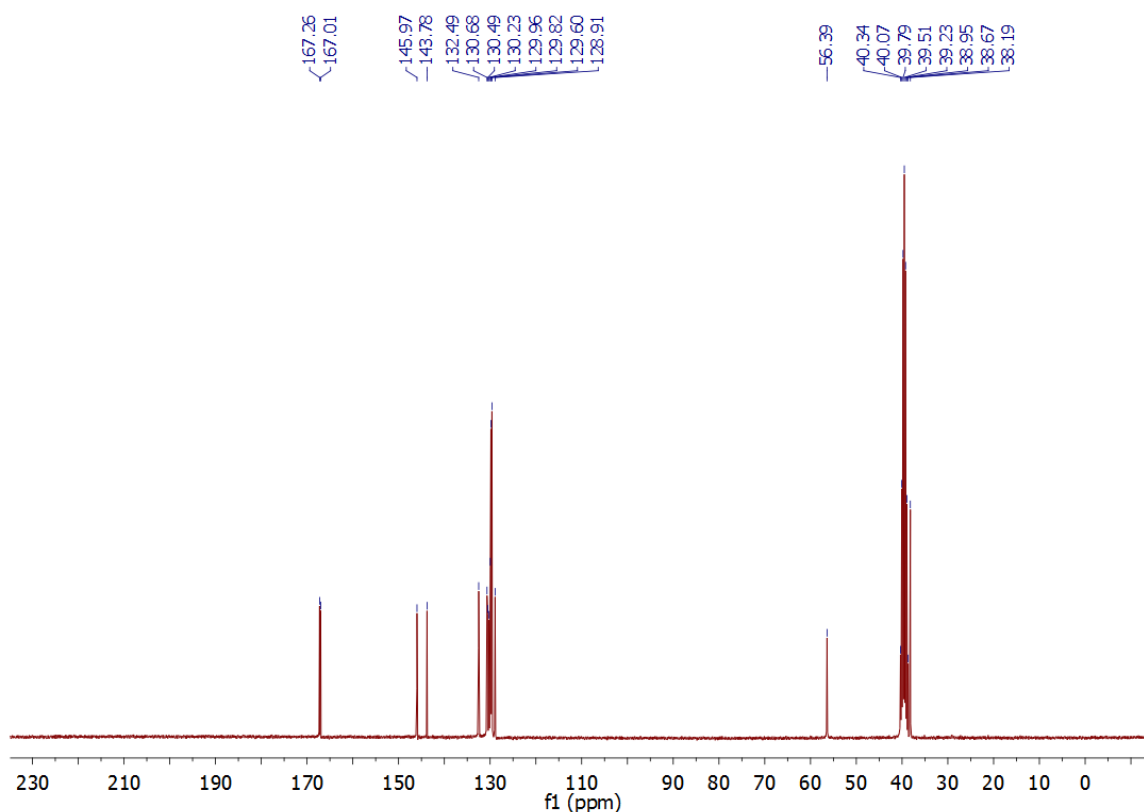

Figure S 7: <sup>13</sup>C NMR spectrum of 2-((methylsulfinyl)methyl)-[1, 1'-biphenyl]-4, 4'-dicarboxylic acid, H<sub>2</sub>L<sup>1</sup>; solvent: *d*<sub>6</sub>-DMSO.

## 5. $^1\text{H}$ NMR Spectra for Digested Samples

For  $\text{H}_2\text{L}^1$  and  $\text{H}_2\text{L}^2$ , the  $\text{CH}_2$  protons were used for integration. For  $\text{H}_2\text{L}^3$ , the  $\text{CH}_3$  protons were used. For  $\text{H}_2\text{L}^4$ , the aldehyde CH proton was used. Peaks used in integration are highlighted;  $\text{H}_2\text{L}^1$  (green cross),  $\text{H}_2\text{L}^2$  (red asterisk),  $\text{H}_2\text{L}^3$  (orange circle),  $\text{H}_2\text{L}^4$  (blue triangle).

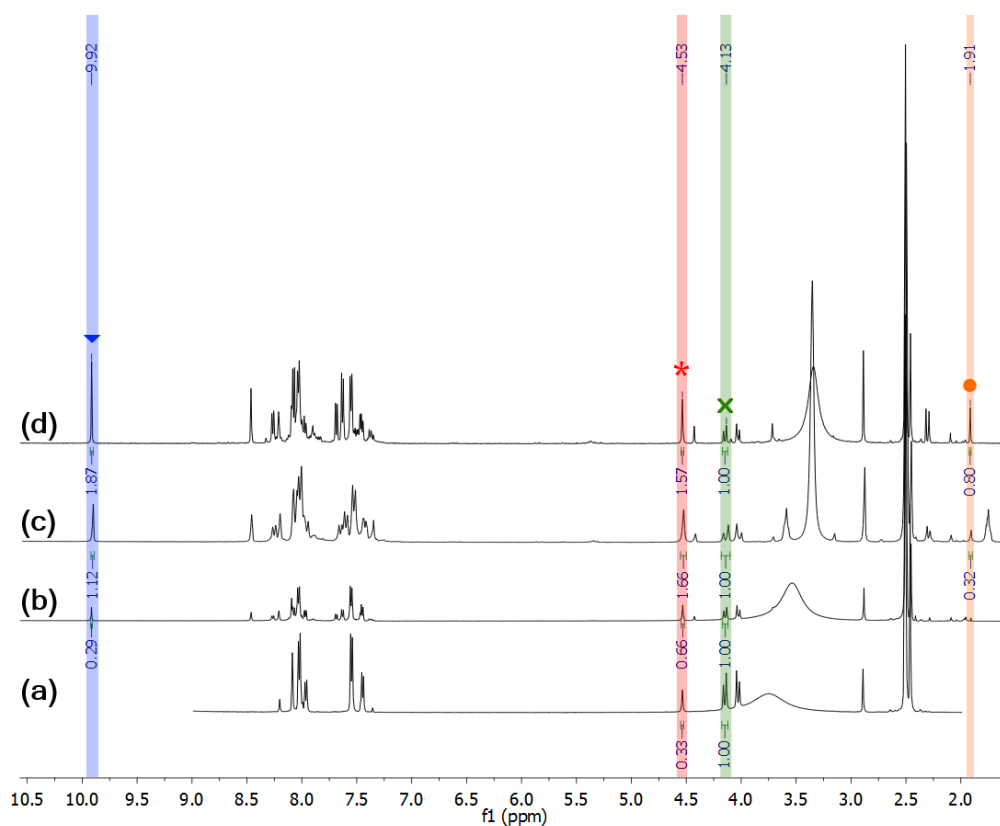

**Figure S 8:**  $^1\text{H}$  NMR spectra of samples digested in DCl and  $d_6$ -DMSO of **1** (a), and **2** after 30 minutes (b), 180 minutes (c), and 300 minutes (d) at 240 °C.

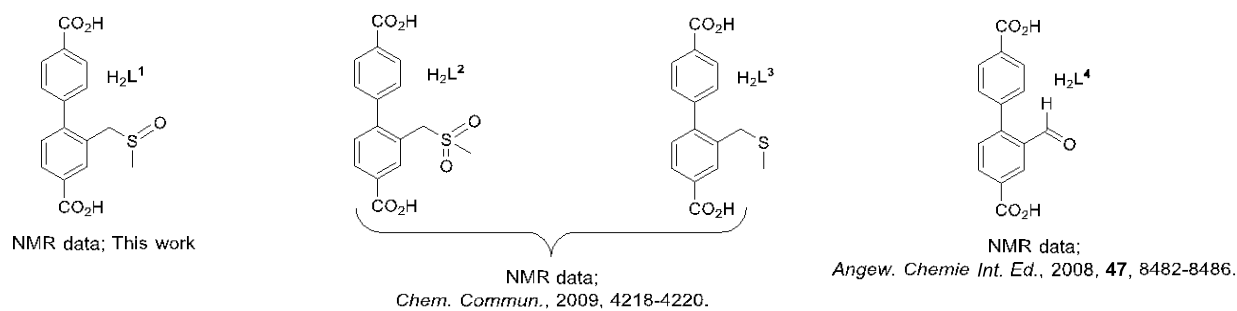

## 6. Mass Spectrometry Data

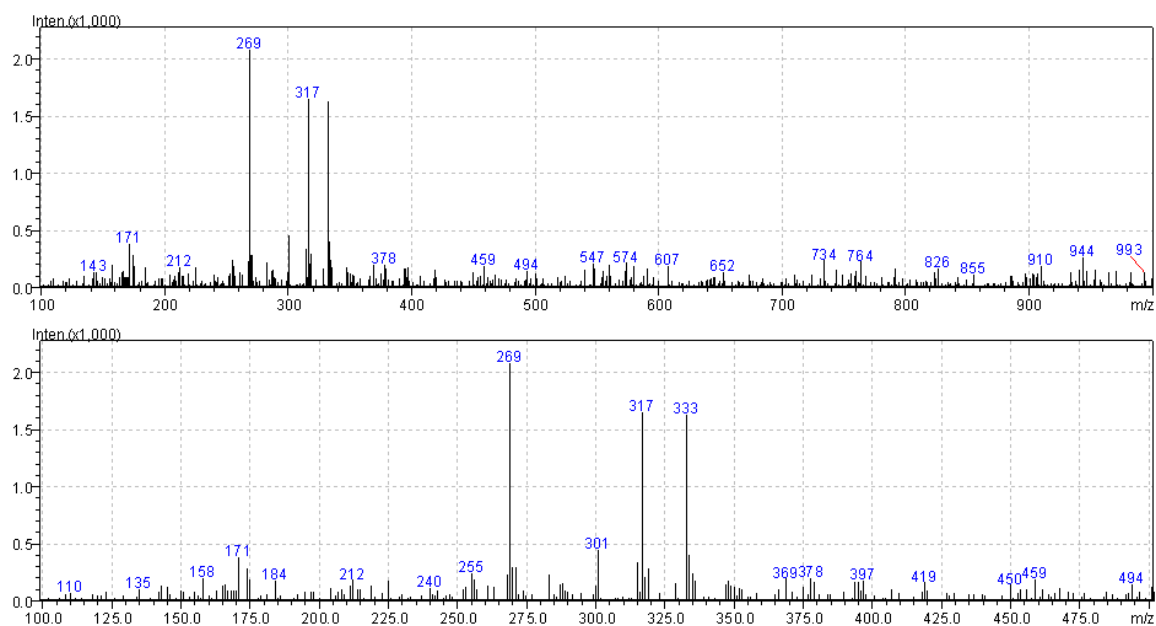

**Figure S 9:** Low-resolution negative-mode electrospray ionization mass spectrum of **1** heated to 240 °C for 30 mins. Top: Spectrum from 100 to 1000 m/z, Bottom: Expanded view of spectrum from 100 to 500 m/z.  $[\text{H}_2\text{L}^1-\text{H}]^- = 317 \text{ m/z}$ ,  $[\text{H}_2\text{L}^2-\text{H}]^- = 333 \text{ m/z}$ ,  $[\text{H}_2\text{L}^3-\text{H}]^- = 301 \text{ m/z}$ ,  $[\text{H}_2\text{L}^4-\text{H}]^- = 269 \text{ m/z}$ .

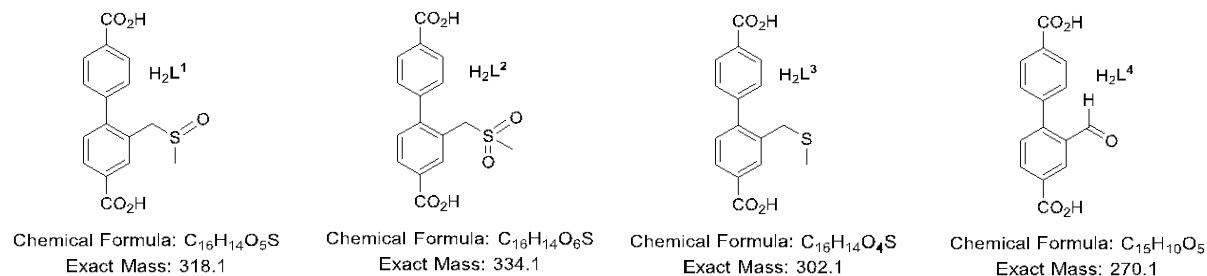



## 7. BET Surface Area Calculations

| BET summary for 1          |                            |                     |
|----------------------------|----------------------------|---------------------|
| Slope                      | 1.976                      |                     |
| Intercept                  | 1.89e-03                   |                     |
| Correlation coefficient, r | 0.999978                   |                     |
| C constant                 | 1046.492                   |                     |
| Surface Area               | 1760.609 m <sup>2</sup> /g |                     |
| Relative Pressure          | Volume @ STP               | 1 / [W((Po/P) - 1)] |
| 9.00e-03                   | 365.5448                   | 1.99e-02            |
| 1.00e-02                   | 371.2658                   | 2.19e-02            |
| 1.20e-02                   | 379.3726                   | 2.57e-02            |
| 1.52e-02                   | 388.2207                   | 3.19e-02            |
| 2.66e-02                   | 403.8505                   | 5.42e-02            |
| 4.03e-02                   | 413.2205                   | 8.14e-02            |
| 5.27e-02                   | 418.664                    | 1.06e-01            |

| BET summary for 2          |                            |                     |
|----------------------------|----------------------------|---------------------|
| Slope                      | 1.52                       |                     |
| Intercept                  | 1.58e-03                   |                     |
| Correlation coefficient, r | 0.999981                   |                     |
| C constant                 | 962.461                    |                     |
| Surface Area               | 2289.411 m <sup>2</sup> /g |                     |
| Relative Pressure          | Volume @ STP               | 1 / [W((Po/P) - 1)] |
| 8.11e-03                   | 465.9707                   | 1.40e-02            |
| 9.02e-03                   | 474.4855                   | 1.53e-02            |
| 1.00e-02                   | 481.8444                   | 1.68e-02            |
| 1.20e-02                   | 491.6319                   | 1.98e-02            |
| 1.53e-02                   | 503.1944                   | 2.47e-02            |
| 2.75e-02                   | 523.4984                   | 4.32e-02            |
| 4.00e-02                   | 533.5512                   | 6.25e-02            |

## 8. References

1. A. D. Burrows, C. G. Frost, M. F. Mahon and C. Richardson, *Chem. Commun.*, 2009, 4218-4220.
2. H. H. Szmant, in *Organic Sulfur Compounds*, ed. N. Kharasch, Pergamon, 1961, pp. 154-169.
3. *USA Pat.*, US2870215 A, 1959.
4. A. Wzorek, K. D. Klika, J. Drabowicz, A. Sato, J. L. Acena and V. A. Soloshonok, *Org. Biomol. Chem.*, 2014, **12**, 4738-4746.
5. L. Field and G. T. Bowman, *J. Org. Chem.*, 1981, **46**, 2771-2775.
